# Supplementary material for: A New Approach for Timing Post-Emergence Weed Control Measures in Crops: The Use of the Differential Form of the Emergence Model
Source: MDPI journal article supplement (doi:10.3390/agronomy12112896), 2022-11-19
Supplement: s1 [file s1]

## SUPPLEMENTARY MATERIAL (I)

**Details of the climatic and soil conditions of the fields in which the emergences were recorded.**

Note: This table complements Table 1 of the manuscript.

| Location            | Year             | Latitude | Longitude | Texture         | Annual precipitation | Annual temperature |
|---------------------|------------------|----------|-----------|-----------------|----------------------|--------------------|
| Huelva1             | 2008             |          |           |                 |                      |                    |
| Huelva2             | 2008             |          |           |                 |                      |                    |
| Arganda             | 2005, 2006       | 40°19' N | 3°29' W   | Loam            | 461                  | 13.5               |
| Golega <sup>+</sup> | 2006             | 39°20' N | 8°32' W   | Sandy loam      | 707                  | 16.3               |
| La Roca1            | 2006, 2007       | 41°34' N | 2°18' E   | Sandy loam      | 501                  | 14.3               |
| La Roca2            | 2008             | 41°34' N | 2°18' E   | Sandy loam      | 718                  | 14.0               |
| La Roca3            | 2009             | 41°34' N | 2°18' E   | Sandy loam      | 529                  | 14.6               |
| Miralcamp           | 2010             | 41°36' N | 0°53' E   | Sandy loam      | 427                  | 13.2               |
| Mollerussa          | 2010             | 41°37' N | 0°54' E   | Sandy loam      | 427                  | 13.2               |
| Albacete            | 2007, 2008       | 38°59' N | 1°51' W   | Sandy clay loam | 353                  | 14.3               |
| Calaf               | 2006, 2007, 2008 | 41°45' N | 1°31' E   | Silt loam       | 273                  | 11.8               |
| El Encín            | 2008             | 40°28' N | 3°21' W   | Silt loam       | 291                  | 14.7               |
| Huelva              | 2006             | 37°17' N | 6°55' W   | Silt loam       | 233                  | 18.2               |
| Igualada            | 2006, 2007, 2008 | 41°34' N | 1°37' E   | Silt loam       | 331                  | 13.8               |
| Murillo             | 2008             | 42°23' N | 1°37' W   | Loam            | 82                   | 12.6               |
| Tajonar             | 2008             | 42°46' N | 1°36' W   | Loam            | 88                   | 12.6               |

The number after the location indicates different field in the same location.

When a location has several years of datasets, the anual precipitation and temperature are the average of those years.

## SUPPLEMENTARY MATERIAL (II)

**Some examples of the calculations of the differential approach applied to the emergence of *Papaver rhoeas* at Igualada 2008.**

**A.** Applying numerical filters to smooth the data of the emergence and the rate of increase (numerical derivative).

**A1.** Starting the iterations with the weekly emergences and the accumulated hydrothermal time in growing degree-days (GDD).

| Week                    | Emergence <sup>1</sup><br>(pl/m <sup>2</sup> )<br>( $E_i$ ) | Hydrothermal<br>time<br>(GDD)<br>(°C) | Smoothed<br>emergence <sup>2</sup><br>(pl/m <sup>2</sup> )<br>( $\bar{E}_i$ ) | Derivative of<br>smoothed<br>emergence <sup>3</sup><br>(pl/m <sup>2</sup> .GDD)<br>( $d\bar{E}_i$ ) | Smoothed<br>derivative<br>(pl/m <sup>2</sup> .GDD)<br>( $d\bar{E}_i$ ) | Specific<br>emergence<br>rate (GDD) <sup>-1</sup><br>(ER) | Ln $\bar{E}_i$<br>(pl/m <sup>2</sup> ) |
|-------------------------|-------------------------------------------------------------|---------------------------------------|-------------------------------------------------------------------------------|-----------------------------------------------------------------------------------------------------|------------------------------------------------------------------------|-----------------------------------------------------------|----------------------------------------|
| <u>First iteration</u>  |                                                             |                                       |                                                                               |                                                                                                     |                                                                        |                                                           |                                        |
| 0                       | 0.0                                                         | 0                                     |                                                                               |                                                                                                     |                                                                        |                                                           |                                        |
| 1                       | 1.8                                                         | 32                                    | 17.45                                                                         |                                                                                                     |                                                                        |                                                           |                                        |
| 2                       | 50.5                                                        | 60                                    | 51.12                                                                         | 1.782                                                                                               |                                                                        |                                                           |                                        |
| 3                       | 101.0                                                       | 75                                    | 93.05                                                                         | 2.293                                                                                               | 1.788                                                                  | 0.019                                                     | 4.533                                  |
| 4                       | 127.6                                                       | 92                                    | 125.50                                                                        | 1.290                                                                                               |                                                                        |                                                           |                                        |
| 5                       | 147.8                                                       | 119                                   | 149.99                                                                        |                                                                                                     |                                                                        |                                                           |                                        |
| 6                       | 174.5                                                       | 142                                   |                                                                               |                                                                                                     |                                                                        |                                                           |                                        |
| <u>Second iteration</u> |                                                             |                                       |                                                                               |                                                                                                     |                                                                        |                                                           |                                        |
| 0                       | 0.0                                                         | 0                                     |                                                                               |                                                                                                     |                                                                        |                                                           |                                        |
| 1                       | 1.8                                                         | 32                                    | 17.45                                                                         |                                                                                                     |                                                                        |                                                           |                                        |
| 2                       | 50.5                                                        | 60                                    | 51.12                                                                         | 1.782                                                                                               |                                                                        |                                                           |                                        |
| 3                       | 101.0                                                       | 75                                    | 93.05                                                                         | 2.293                                                                                               | 1.788                                                                  | 0.019                                                     | 4.533                                  |
| 4                       | 127.6                                                       | 92                                    | 125.50                                                                        | 1.290                                                                                               | 1.494                                                                  | 0.012                                                     | 4.832                                  |
| 5                       | 147.8                                                       | 119                                   | 149.99                                                                        | 0.898                                                                                               |                                                                        |                                                           |                                        |
| 6                       | 174.5                                                       | 142                                   | 170.19                                                                        |                                                                                                     |                                                                        |                                                           |                                        |
| 7                       | 188.2                                                       | 189                                   |                                                                               |                                                                                                     |                                                                        |                                                           |                                        |
| <u>Third iteration</u>  |                                                             |                                       |                                                                               |                                                                                                     |                                                                        |                                                           |                                        |
| 0                       | 0.0                                                         | 0                                     |                                                                               |                                                                                                     |                                                                        |                                                           |                                        |
| 1                       | 1.8                                                         | 32                                    | 17.45                                                                         |                                                                                                     |                                                                        |                                                           |                                        |
| 2                       | 50.5                                                        | 60                                    | 51.12                                                                         | 1.782                                                                                               |                                                                        |                                                           |                                        |
| 3                       | 101.0                                                       | 75                                    | 93.05                                                                         | 2.293                                                                                               | 1.788                                                                  | 0.019                                                     | 4.533                                  |
| 4                       | 127.6                                                       | 92                                    | 125.50                                                                        | 1.290                                                                                               | 1.494                                                                  | 0.012                                                     | 4.832                                  |
| 5                       | 147.8                                                       | 119                                   | 149.99                                                                        | 0.898                                                                                               | 0.891                                                                  | 0.006                                                     | 5.011                                  |
| 6                       | 174.5                                                       | 142                                   | 170.19                                                                        | 0.485                                                                                               |                                                                        |                                                           |                                        |
| 7                       | 188.2                                                       | 189                                   | 184.27                                                                        |                                                                                                     |                                                                        |                                                           |                                        |
| 8                       | 190.1                                                       | 227                                   |                                                                               |                                                                                                     |                                                                        |                                                           |                                        |

<sup>1</sup> Emergence at week  $i$ :  $E_i$

<sup>2</sup> Smoothed emergence at week  $i$ :  $\bar{E}_i = \frac{E_{i-1} + E_i + E_{i+1}}{3}$

<sup>3</sup> Derivative of smoothed emergence at week  $i$ :  $d\bar{E}_i = \frac{\bar{E}_{i+1} - \bar{E}_{i-1}}{t_{H,i+1} - t_{H,i-1}}$

<sup>4</sup> Smoothed derivative at week  $i$ :  $d\bar{E}_i = \frac{d\bar{E}_{i-1} + d\bar{E}_i + d\bar{E}_{i+1}}{3}$

<sup>5</sup> Specific emergence rate at week  $i$ :  $ER = \frac{d\bar{E}_i}{\bar{E}_i}$

**A2.** Obtaining the first two linear regressions ( $A = -mB + n$ ) between the specific emergence rate (ER= A) and the natural logarithm of the smoothed emergence ( $\ln \bar{E}_t=B$ ) for the two available data points at the end of week 7 and the three available data points at the end of week 8.

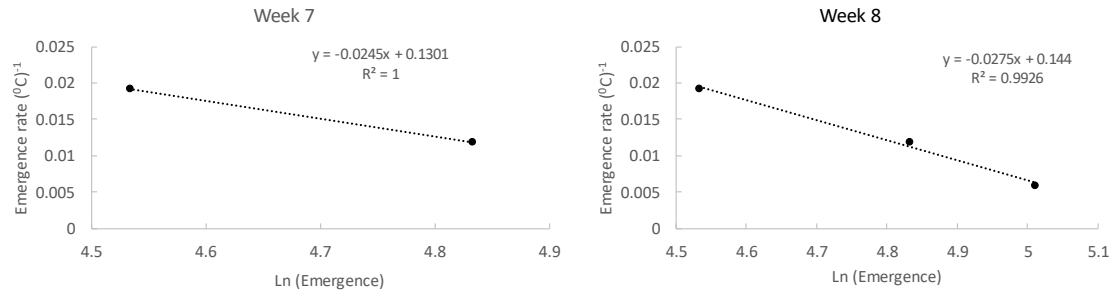

**A3.** Obtaining the maximum expected seedling emergence (K) in the field.

Week 7:  $m = 0.0245$      $n = m \ln(K)$      $0.1301 = 0.0245 \ln(K)$      $K = 204.15 \text{ pl/m}^2$

Week 8:  $m = 0.0275$      $n = m \ln(K)$      $0.1440 = 0.0275 \ln(K)$      $K = 189.01 \text{ pl/m}^2$

These steps are repeated for every new week of counts, obtaining new values of the expected maximum seedling emergence K.

**A4.** The iterations stopped when the numerical derivative of the smoothed emergence dropped below the threshold of 0.03 (in week 11 in this case and after six iterations).

| Week            | Emergence <sup>1</sup><br>(pl/m <sup>2</sup> )<br>( $E_i$ ) | Hydrothermal<br>time<br>(GDD)<br>(°C) | Smoothed<br>emergence <sup>2</sup><br>(pl/m <sup>2</sup> )<br>( $\bar{E}_i$ ) | Derivative of<br>smoothed<br>emergence <sup>3</sup><br>(pl/m <sup>2</sup> .GDD)<br>( $d\bar{E}_i$ ) | Smoothed<br>derivative<br>(pl/m <sup>2</sup> .GDD)<br>( $d\bar{E}_i$ ) | Specific<br>emergence<br>rate (GDD) <sup>-1</sup><br>(ER) | $\ln \bar{E}_i$<br>(pl/m <sup>2</sup> ) |
|-----------------|-------------------------------------------------------------|---------------------------------------|-------------------------------------------------------------------------------|-----------------------------------------------------------------------------------------------------|------------------------------------------------------------------------|-----------------------------------------------------------|-----------------------------------------|
| Sixth iteration |                                                             |                                       |                                                                               |                                                                                                     |                                                                        |                                                           |                                         |
| 0               | 0.0                                                         | 0                                     |                                                                               |                                                                                                     |                                                                        |                                                           |                                         |
| 1               | 1.8                                                         | 32                                    | 17.45                                                                         |                                                                                                     |                                                                        |                                                           |                                         |
| 2               | 50.5                                                        | 60                                    | 51.12                                                                         | 1.782                                                                                               |                                                                        |                                                           |                                         |
| 3               | 101.0                                                       | 75                                    | 93.05                                                                         | 2.293                                                                                               | 1.788                                                                  | 0.019                                                     | 4.533                                   |
| 4               | 127.6                                                       | 92                                    | 125.50                                                                        | 1.290                                                                                               | 1.494                                                                  | 0.012                                                     | 4.832                                   |
| 5               | 147.8                                                       | 119                                   | 149.99                                                                        | 0.898                                                                                               | 0.891                                                                  | 0.006                                                     | 5.011                                   |
| 6               | 174.5                                                       | 142                                   | 170.19                                                                        | 0.485                                                                                               | 0.538                                                                  | 0.003                                                     | 5.137                                   |
| 7               | 188.2                                                       | 189                                   | 184.27                                                                        | 0.230                                                                                               | 0.262                                                                  | 0.001                                                     | 5.216                                   |
| 8               | 190.1                                                       | 227                                   | 189.78                                                                        | 0.070                                                                                               | 0.103                                                                  | 0.001                                                     | 5.246                                   |
| 9               | 191.0                                                       | 281                                   | 190.69                                                                        | 0.010                                                                                               |                                                                        |                                                           |                                         |
| 10              | 191.0                                                       | 346                                   | 191.00                                                                        |                                                                                                     |                                                                        |                                                           |                                         |
| 11              | 191.0                                                       | 404                                   |                                                                               |                                                                                                     |                                                                        |                                                           |                                         |

<sup>1</sup> Emergence at week i:  $E_i$

<sup>2</sup> Smoothed emergence at week i:  $\bar{E}_i = \frac{E_{i-1} + E_i + E_{i+1}}{3}$

<sup>3</sup> Derivative of smoothed emergence at week i:  $d\bar{E}_i = \frac{\bar{E}_{i+1} - \bar{E}_{i-1}}{t_{H,i+1} - t_{H,i-1}}$

<sup>4</sup> Smoothed derivative at week i:  $d\bar{E}_i = \frac{d\bar{E}_{i-1} + d\bar{E}_i + d\bar{E}_{i+1}}{3}$

<sup>5</sup> Specific emergence rate at week i:  $ER = \frac{d\bar{E}_i}{\bar{E}_i}$

After counting the emergence at the end of week eleven we observe that the derivative of the smoothed emergence drops to 0.01, which is below the threshold of 0.03 and even the threshold of 0.05. Consequently, we consider that the maximum emergence is already reached (191 pl/m<sup>2</sup>) and we stop the counts. Note that the field had no emergences since week 9.

**A5.** Obtaining the last linear regression ( $A = -mB + n$ ) between the specific emergence rate (ER =  $A$ ) and the natural logarithm of the smoothed emergence ( $\ln \bar{E}_t = B$ ) for the six data points available at the end of week 11.

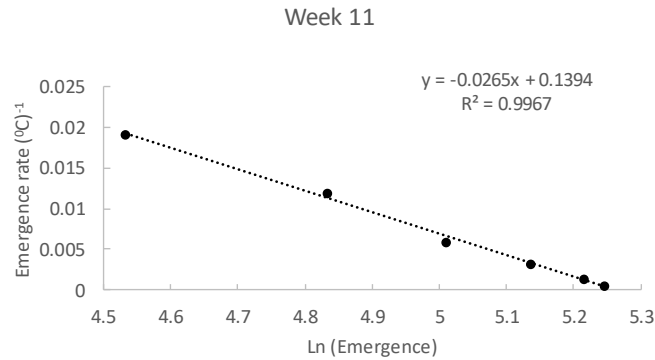

**A6.** Obtaining the maximum expected seedling emergence ( $K$ ) in the field at week 11.

$$m = 0.0265$$

$$n = m \ln(K) \quad 0.1394 = 0.0265 \ln(K) \quad K = 192.7 \text{ pl/m}^2$$

According to the differential model, the expected number of emergences were 192.7 pl/m<sup>2</sup>. The seedling population in the field was 191 pl/m<sup>2</sup> at this moment. The prediction was considered accurate because the difference between the predicted and the actual value was less than 10%.

**B.** Applying numerical filters to smooth the rate of increase of the emergences (numerical derivative).

**B1.** Summary of all iterations with the weekly emergences and the accumulated hydrothermal time in growing degree-days (GDD). Iterations are ceased when the derivative of emergence reached the threshold of 0.03.

| Week | Emergence <sup>1</sup><br>(pl/m <sup>2</sup> )<br>( $E_i$ ) | Hydrothermal<br>time<br>(GDD)<br>(°C) | Derivative of<br>emergence <sup>3</sup><br>(pl/m <sup>2</sup> .GDD)<br>( $d\bar{E}_i$ ) | Smoothed<br>derivative<br>(pl/m <sup>2</sup> .GDD)<br>( $\overline{dE}_i$ ) | Specific<br>emergence<br>rate (GDD) <sup>-1</sup><br>( $ER$ ) | $\ln \bar{E}_i$<br>(pl/m <sup>2</sup> ) |
|------|-------------------------------------------------------------|---------------------------------------|-----------------------------------------------------------------------------------------|-----------------------------------------------------------------------------|---------------------------------------------------------------|-----------------------------------------|
| 0    | 0.0                                                         | 0                                     |                                                                                         |                                                                             |                                                               |                                         |
| 1    | 1.8                                                         | 32                                    | 0.85                                                                                    |                                                                             |                                                               |                                         |
| 2    | 50.5                                                        | 60                                    | 2.34                                                                                    | 1.85                                                                        | 0.036                                                         | 3.922                                   |
| 3    | 101.0                                                       | 75                                    | 2.38                                                                                    | 1.93                                                                        | 0.019                                                         | 4.615                                   |
| 4    | 127.6                                                       | 92                                    | 1.06                                                                                    | 1.46                                                                        | 0.011                                                         | 4.849                                   |
| 5    | 147.8                                                       | 119                                   | 0.94                                                                                    | 0.86                                                                        | 0.006                                                         | 4.996                                   |
| 6    | 174.5                                                       | 142                                   | 0.57                                                                                    | 0.57                                                                        | 0.003                                                         | 5.162                                   |
| 7    | 188.2                                                       | 189                                   | 0.18                                                                                    | 0.26                                                                        | 0.001                                                         | 5.238                                   |
| 8    | 190.1                                                       | 227                                   | 0.03                                                                                    |                                                                             |                                                               |                                         |
| 9    | 191.0                                                       | 281                                   |                                                                                         |                                                                             |                                                               |                                         |

<sup>1</sup> Emergence at week  $i$ :  $E_i$

<sup>2</sup> Smoothed emergence at week  $i$ :  $\bar{E}_i = \frac{E_{i-1} + E_i + E_{i+1}}{3}$

<sup>3</sup> Derivative of smoothed emergence at week  $i$ :  $d\bar{E}_i = \frac{\bar{E}_{i+1} - \bar{E}_{i-1}}{t_{H,i+1} - t_{H,i-1}}$

<sup>4</sup> Smoothed derivative at week  $i$ :  $\overline{dE}_i = \frac{d\bar{E}_{i-1} + d\bar{E}_i + d\bar{E}_{i+1}}{3}$

<sup>5</sup> Specific emergence rate at week  $i$ :  $ER = \frac{\overline{dE}_i}{\bar{E}_i}$

**B2.** Linear regression ( $A = -mB + n$ ) between the specific emergence rate (ER) and the natural logarithm of the emergence ( $\ln \bar{E}_i$ ) for the six data points available at the end of week 9.

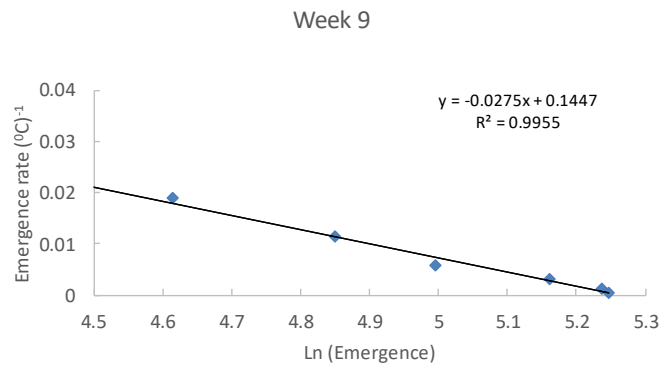

**B3.** Obtaining the maximum expected seedling emergence ( $K$ ) in the field at week 11.

$$m = 0.0265$$

$$n = m \ln(K) \quad 0.1394 = 0.0265 \ln(K) \quad K = 192.7 \text{ pl/m}^2$$

According to the differential model, the expected number of emergences were 192.7 pl/m<sup>2</sup>. The seedling population in the field was 191 pl/m<sup>2</sup> at this moment. The prediction was considered accurate because the difference between the predicted and the actual value was less than 10%.
